# Supplementary material
Source: PubMed Central journal article supplement (PMC8575095)
Supplement: inf-40-e482-s001.pdf [file inf-40-e482-s001.pdf]

**Supplementary table** Summary of findings from studies of children and adolescents with persistent symptoms after SARS-CoV-2 infection

| Study                                                        | Study details                      |                                  |             |                          |                                   |                                    |                |                                                 | Participants*                        |        |                      |                        |                        |     |                                | Frequency of persisting symptoms° |         |                   |                            |                |                       |                         |       |                         |                            |                            |                                                                                                                                                                                                                                                                                         |                                                                                                                                                                                                                                                                                                                                            |
|--------------------------------------------------------------|------------------------------------|----------------------------------|-------------|--------------------------|-----------------------------------|------------------------------------|----------------|-------------------------------------------------|--------------------------------------|--------|----------------------|------------------------|------------------------|-----|--------------------------------|-----------------------------------|---------|-------------------|----------------------------|----------------|-----------------------|-------------------------|-------|-------------------------|----------------------------|----------------------------|-----------------------------------------------------------------------------------------------------------------------------------------------------------------------------------------------------------------------------------------------------------------------------------------|--------------------------------------------------------------------------------------------------------------------------------------------------------------------------------------------------------------------------------------------------------------------------------------------------------------------------------------------|
| Author<br>Study type (level of evidence)<br>Country          | Time of evaluation after infection | Questionnaire or phone interview | Study visit | Total number of children | Children with persistent symptoms | Children with SARS-CoV-2 infection | Other controls | Proportion of children with persistent symptoms | Age                                  | Female | Laboratory confirmed | Initially asymptomatic | Initially hospitalised | ICU | Pre-existing medical condition | Headache                          | Fatigue | Sleep disturbance | Concentration difficulties | Abdominal pain | Myalgia or arthralgia | Congested or runny nose | Cough | Chest pain or tightness | Loss of appetite or weight | Disturbed smell or anosmia | Rash                                                                                                                                                                                                                                                                                    | Other symptoms°<br>and important findings                                                                                                                                                                                                                                                                                                  |
| <b>Studies with controls</b>                                 |                                    |                                  |             |                          |                                   |                                    |                |                                                 |                                      |        |                      |                        |                        |     |                                |                                   |         |                   |                            |                |                       |                         |       |                         |                            |                            |                                                                                                                                                                                                                                                                                         |                                                                                                                                                                                                                                                                                                                                            |
| Blankenburg <i>et al</i> <sup>60</sup><br>CS (2C)<br>Germany | Random                             | ✓                                | ✓           | 1533                     | nr                                | 178                                | 1327           | nr                                              | Median 15y<br>r 10-38y<br>IQR 14-16y | 56%    | 100%                 | nr                     | nr                     | nr  | nr                             | 109                               | 71      | 112               | 144                        | 82             | 62                    | 3                       | nr    | nr                      | nr                         | nr                         | nr                                                                                                                                                                                                                                                                                      | Memory loss (91, 51%), listlessness (139, 78%), feeling sad (103, 58%), feeling angry (119, 67%), feeling tense (155, 87%)<br><b>No difference in symptoms between seropositive and seronegative children</b><br>Positive correlation between increasing age and most symptoms and between female sex and neurocognitive and pain symptoms |
| Miller <i>et al</i> <sup>66</sup><br>PCS (2B)<br>UK          | >4w                                | ✓                                | -           | 4678                     | 8                                 | 174                                | 4504           | 5%                                              | ≤17y                                 | nr     | 100%                 | nr                     | nr                     | nr  | nr                             | nr                                | nr      | nr                | nr                         | nr             | nr                    | nr                      | nr    | nr                      | nr                         | nr                         | <b>Children with an infection more likely to have persistent symptoms (8/174 (5%) vs 72/4504 (2%) reported ≥1 symptom &gt;4w)</b><br>Positive correlation between increasing age, female sex, pre-existing medical condition and symptoms                                               |                                                                                                                                                                                                                                                                                                                                            |
| Molteni <i>et al</i> <sup>65</sup><br>PCS (2B)<br>UK         | >4w<br><br>>8w                     | ✓                                | -           | 3468                     | 77                                | 1734                               | 1734           | 4%                                              | Median 13y<br>IQR 10-15y             | 50%    | 100%                 | nr                     | 2%                     | nr  | 12%                            | nr                                | nr      | nr                | nr                         | nr             | nr                    | nr                      | nr    | nr                      | nr                         | nr                         | <b>Seropositive children slightly more likely to have persistent symptoms than seronegative (77/1734 (4%) vs 15/1734 (1%) reported ≥1 symptom &gt;4w)</b><br>25/1379 (2%) of seropositive children reported ≥1 symptom >12w<br>Positive correlation between increasing age and symptoms |                                                                                                                                                                                                                                                                                                                                            |

|                                       |      |   |   |      |      |      |      |     |            |     |      |     |    |    |     |     |       |    |    |     |     |    |    |     |     |     |                                                                                                                                                                                                                                                                                     |                                                                                                                                                                                        |
|---------------------------------------|------|---|---|------|------|------|------|-----|------------|-----|------|-----|----|----|-----|-----|-------|----|----|-----|-----|----|----|-----|-----|-----|-------------------------------------------------------------------------------------------------------------------------------------------------------------------------------------------------------------------------------------------------------------------------------------|----------------------------------------------------------------------------------------------------------------------------------------------------------------------------------------|
| Radtko <i>et al</i> <sup>β4</sup>     | >4w  | ✓ | - | 1355 | 4    | 109  | 1246 | 4%  | Median 11y | 53% | 100% | nr  | nr | nr | nr  | 5   | 7     | 3  | nr | 3   | nr  | 3  | 2  | nr  | nr  | nr  | nr                                                                                                                                                                                                                                                                                  | <b>No difference in symptoms between seropositive and -negative children (10/109 (9%) vs 121/1246 (10%) reported ≥1 symptom &gt;4w, 4/109 (4%) vs 28/1246 (2%) ≥1 symptom &gt;12w)</b> |
| PCS (2B)                              |      |   |   |      |      |      |      |     |            |     |      |     |    |    | 5%  | 6%  | 3%    |    | 3% | nr  | 3%  | 2% |    |     |     |     |                                                                                                                                                                                                                                                                                     |                                                                                                                                                                                        |
| Switzerland                           | >12w |   |   |      |      |      |      |     |            |     |      |     |    |    | nr  | 3   | 2     | 2  | 1  | nr  | 1   | nr | 1  | nr  | nr  | nr  |                                                                                                                                                                                                                                                                                     |                                                                                                                                                                                        |
|                                       |      |   |   |      |      |      |      |     |            |     |      |     |    |    |     | 3%  | 2%    | 2% | 1% |     | 1%  |    | 1% |     |     |     |                                                                                                                                                                                                                                                                                     |                                                                                                                                                                                        |
| Stephenson <i>et al</i> <sup>β7</sup> | >12w | ✓ |   | 6804 | 2038 | 3065 | 3739 | 66% | r 11-17y   | 64% | 100% | 65% | nr | nr | nr  | 710 | 1,196 | nr | nr | 119 | 165 | nr | 98 | 216 | 296 | 414 | 83                                                                                                                                                                                                                                                                                  |                                                                                                                                                                                        |
| PCS (2B)                              |      |   |   |      |      |      |      |     |            |     |      |     |    |    | 23% | 39% |       |    | 4% | 5%  |     | 3% | 7% | 10% | 14% | 3%  | Dyspnoea (717, 23%), dizziness or light-headedness (419, 14%), chills (269, 9%), sore throat (291, 10%), confusion, disorientation or drowsiness (198, 7%), earache or ringing in ears (191, 6%), eye-soreness (182, 6%), diarrhoea (92, 3%), hoarse voice (56, 2%), fever (50, 2%) |                                                                                                                                                                                        |
| UK                                    |      |   |   |      |      |      |      |     |            |     |      |     |    |    |     |     |       |    |    |     |     |    |    |     |     |     | Similar symptoms in infected and uninfected children, but higher prevalence in infected children                                                                                                                                                                                    |                                                                                                                                                                                        |
|                                       |      |   |   |      |      |      |      |     |            |     |      |     |    |    |     |     |       |    |    |     |     |    |    |     |     |     | <b>Infected children had more had similar symptoms to uninfected but with a higher prevalence, especially for multiple symptoms</b>                                                                                                                                                 |                                                                                                                                                                                        |
|                                       |      |   |   |      |      |      |      |     |            |     |      |     |    |    |     |     |       |    |    |     |     |    |    |     |     |     | No difference in mental health or well-being between infected and uninfected children (40% of infected children reported feeling worried vs 39% uninfected)                                                                                                                         |                                                                                                                                                                                        |
|                                       |      |   |   |      |      |      |      |     |            |     |      |     |    |    |     |     |       |    |    |     |     |    |    |     |     |     | Positive correlation between female sex, increasing age, worse pre-infection physical and mental health and higher number of symptoms                                                                                                                                               |                                                                                                                                                                                        |

**Studies without controls**

|                                               |             |   |   |    |    |    |   |     |           |     |      |    |     |    |    |     |     |     |    |    |     |    |     |     |     |     |                                                                            |                                                                                                                                                                                                                                                                                                                        |
|-----------------------------------------------|-------------|---|---|----|----|----|---|-----|-----------|-----|------|----|-----|----|----|-----|-----|-----|----|----|-----|----|-----|-----|-----|-----|----------------------------------------------------------------------------|------------------------------------------------------------------------------------------------------------------------------------------------------------------------------------------------------------------------------------------------------------------------------------------------------------------------|
| Ashkenazi-Hoffnung <i>et al</i> <sup>β9</sup> | Median 112d | ✓ | ✓ | 90 | 90 | 90 | 0 | nr  | Mean 12y  | 41% | 100% | 0  | 12% | nr | nr | 26  | 64  | 30  | 8  | nr | 41  | nr | 9   | 28  | 17  | 23  | nr                                                                         | Impairment in daily activities (53, 59%), dyspnoea (45, 50%), paraesthesia (36, 29%), hair loss (24, 27%), gastrointestinal symptoms (18, 20%), dizziness (17, 19%), memory impairment (16, 18%), vasomotor complaints (13, 14%), tremor (12, 1%), palpitations (8, 9%), tic exacerbation (2, 2%) and tinnitus (1, 1%) |
| PCS (2B)                                      |             |   |   |    |    |    |   |     | SD 5y     |     |      |    |     |    |    | 29% | 71% | 33% | 9% |    | 56% |    | 10% | 31% | 19% | 26% |                                                                            | Changes on chest radiograph (12, 13%), abnormal spirometry (5, 6%), abnormal exercise challenge test (3, 6%), air trapping by plethysmography (15, 17%), abnormal electrocardiograph (2, 2%), abnormal cardiac MRI (81, 1%)                                                                                            |
| Israel                                        | r 33-410d   |   |   |    |    |    |   |     |           |     |      |    |     |    |    |     |     |     |    |    |     |    |     |     |     |     | Positive correlation between increasing age and fatigue, dyspnoea, myalgia |                                                                                                                                                                                                                                                                                                                        |
| Blomberg <i>et al</i> <sup>β3</sup>           | >5m         | ✓ | ✓ | 16 | 2  | 16 | 0 | 13% | Median 8y | 56% | 100% | nr | 0   | 0  | nr | nr  | nr  | nr  | nr | 1  | nr  | nr | nr  | nr  | nr  | 2   | nr                                                                         |                                                                                                                                                                                                                                                                                                                        |

|                                                   |                      |   |   |     |     |     |   |     |                                             |     |      |     |      |    |     |     |     |     |     |     |     |    |     |    |     |    |                                                          |                                                                                                                                                                                                                                                                                                                                                                                                                                                                                                                                                                                                                                                                                                                                                                                                                 |
|---------------------------------------------------|----------------------|---|---|-----|-----|-----|---|-----|---------------------------------------------|-----|------|-----|------|----|-----|-----|-----|-----|-----|-----|-----|----|-----|----|-----|----|----------------------------------------------------------|-----------------------------------------------------------------------------------------------------------------------------------------------------------------------------------------------------------------------------------------------------------------------------------------------------------------------------------------------------------------------------------------------------------------------------------------------------------------------------------------------------------------------------------------------------------------------------------------------------------------------------------------------------------------------------------------------------------------------------------------------------------------------------------------------------------------|
| PCS (2B)<br>Norway                                |                      |   |   |     |     |     |   |     | IQR 6-12y                                   |     |      |     |      |    |     |     |     |     |     | 6%  |     |    |     |    | 13% |    |                                                          |                                                                                                                                                                                                                                                                                                                                                                                                                                                                                                                                                                                                                                                                                                                                                                                                                 |
| Brackel <i>et al</i> <sup>2</sup>                 | Random               | ✓ | - | 89  | 89  | 89  | 0 | nr  | Median 13y                                  | nr  | nr   | nr  | nr   | nr | nr  | 34  | 77  | nr  | 40  | 1   | 25  | nr | nr  | 31 | 2   | nr | 6                                                        | Dyspnoea (49, 55%), diarrhoea (21, 24%) memory loss (12,13%), palpitations (16, 18%), dizziness (3, 3%), brain fog (2%), fever (2, 2%)                                                                                                                                                                                                                                                                                                                                                                                                                                                                                                                                                                                                                                                                          |
| CS (2C)<br>Netherlands                            |                      |   |   |     |     |     |   |     | r 2-18y<br>IQR 9-15y                        |     |      |     |      |    | 38% | 87% |     | 45% | 6%  | 28% |     |    | 25% | 2% |     | 7% | Mild or severe limitation in daily functioning (75, 84%) |                                                                                                                                                                                                                                                                                                                                                                                                                                                                                                                                                                                                                                                                                                                                                                                                                 |
| Buonsenso <i>et al</i> <sup>1</sup>               | >4w                  | ✓ | - | 510 | 510 | 510 | 0 | nr  | Mean 10y<br>SD 3.8y                         | 56% | 28%  | 12% | 4%   | nr | 56% | 410 | 410 | 287 | 309 | 387 | 309 | nr | 151 | nr | 253 | nr | 267                                                      | Decreased physical activity (459, 90%), tiredness/weakness (444, 87%), change in energy levels (425, 83%), change in mood (300, 59%), post-exertional malaise (274, 54%), irritability (262, 51%), dizziness (245, 48%), nausea (233, 46%), sore throat (230, 45%), diarrhoea/vomiting (216, 42%), red eyes (206, 40%), palpitations (205, 40%), difficulty in doing everyday tasks (204, 40%), red/cracked lips (201, 39%), difficulty processing information (167, 33%), short term memory issues (167, 33%), fever (151, 30%), peeling skin on hands/feet (143, 28%), swollen neck glands (128, 25%), flu-like symptoms (121, 24%), swollen hands/feet (107, 21%), ulcers (79, 15%), twitches (55, 11%), word repetition (52, 10%), tics (47, 9%), stuttering (40, 8%), swearing (26, 5%), growling (24, 5%) |
| CS (2C)<br>International<br>UK (67%)<br>USA (18%) |                      |   |   |     |     |     |   |     |                                             |     |      |     |      |    |     |     |     |     |     |     |     |    |     |    |     |    |                                                          |                                                                                                                                                                                                                                                                                                                                                                                                                                                                                                                                                                                                                                                                                                                                                                                                                 |
| Buonsenso <i>et al</i> <sup>6</sup>               | Mean 163d<br>SD 114d | ✓ | - | 129 | 75  | 129 | 0 | 58% | Mean 11y<br>SD 4.4y                         | 48% | 100% | 25% | 5%   | 2% | nr  | 13  | 14  | 24  | 13  | 3   | 13  | 16 | 7   | 8  | 10  | 6  | 9                                                        | Constipation (8, 6%), palpitations (5, 4%), hypersomnia (4, 3%), diarrhoea (2, 2%), hair loss (2, 2%), skin peeling (1, 1%)                                                                                                                                                                                                                                                                                                                                                                                                                                                                                                                                                                                                                                                                                     |
| CS (2C)<br>Italy                                  |                      |   |   |     |     |     |   |     |                                             |     |      |     |      |    |     |     |     |     |     |     |     |    |     |    |     |    |                                                          |                                                                                                                                                                                                                                                                                                                                                                                                                                                                                                                                                                                                                                                                                                                                                                                                                 |
| Osmanov <i>et al</i> <sup>0</sup>                 | >5m                  | ✓ | - | 518 | 126 | 518 | 0 | 24% | Median 10y<br>r 2d-18y<br>IQR 3-15.2y       | 52% | 100% | nr  | 100% | 3% | 45% | 17  | 53  | 26  | nr  | 10  | 6   | 10 | 5   | 7  | 12  | 22 | 8                                                        | Disturbed taste (16, 3%), decreased physical activity (24, 5%), hypersomnia (15, 3%), hyperhidrosis (13, 3%), diarrhoea (10, 2%), blurred vision (10, 2%), hair loss (9, 2%), constipation (8, 2%), difficulty breathing (7, 1%), nausea (6, 1%), dizziness (5, 1%), palpitations (5, 1%)<br><br>Positive correlation between increasing age, allergic disease and symptoms                                                                                                                                                                                                                                                                                                                                                                                                                                     |
| PCS (2B)<br>Russia                                |                      |   |   |     |     |     |   |     |                                             |     |      |     |      |    |     |     |     |     |     |     |     |    |     |    |     |    |                                                          |                                                                                                                                                                                                                                                                                                                                                                                                                                                                                                                                                                                                                                                                                                                                                                                                                 |
| Say <i>et al</i> <sup>1</sup>                     | >4w<br><br>>12w      | ✓ | ✓ | 151 | 12  | 151 | 0 | 8%  | Mean 4y<br>Median 2y<br>SD 3.5y<br>IQR 1-7y | 42% | 100% | 36% | 8%   | nr | nr  | nr  | nr  | 4   | nr  | nr  | nr  | nr | 7   | nr | nr  | nr | nr                                                       |                                                                                                                                                                                                                                                                                                                                                                                                                                                                                                                                                                                                                                                                                                                                                                                                                 |
| PCS (2B)<br>Australia                             |                      |   |   |     |     |     |   |     |                                             |     |      |     |      |    |     | 0   | 0   | 0   | 0   | 0   | 0   | 0  | 0   | 0  | 0   | 0  | 0                                                        |                                                                                                                                                                                                                                                                                                                                                                                                                                                                                                                                                                                                                                                                                                                                                                                                                 |
| Smane <i>et al</i> <sup>2</sup>                   | Mean 101d            | ✓ | ✓ | 30  | 9   | 30  | 0 | 30% | Mean 9y                                     | 43% | 100% | 17% | 17%  | 0  | 23% | 1   | nr  | nr  | nr  | nr  | 1   | nr | nr  | nr | nr  | 1  | nr                                                       | Fever (2, 7%), ageusia (1, 3%), microhaematuria (1, 3%)                                                                                                                                                                                                                                                                                                                                                                                                                                                                                                                                                                                                                                                                                                                                                         |
